# Supplementary material for: Evaluation of item candidates for a diabetic retinopathy quality of life item bank
Source: Springer Nature journal article supplement (doi:10.1007/s11136-012-0307-3), 2012-11-07
Supplement: MOESM3 [file 278170]

**Supplemental** **Table S2 – Sociodemographic and clinical characteristics of the 57 participants***

| **Variable** | **n (%)** |
| --- | --- |
| *Diabetes type* |  |
| Type 2 | 42 (73.7%) |
| *Gender* |  |
| Male | 39 (68.4%) |
| *Vision impairment (right eye)* |  |
| None (≤0.3 LogMAR) | 28 (49.1%) |
| Mild (>0.3 LogMAR ≤0.48) | 8 (14.0%) |
| Moderate/severe (>0.48 LogMAR) | 19 (33.3%) |
| *Vision impairment (left eye)* |  |
| None (≤0.3 LogMAR) | 30 (52.6%) |
| Mild (>0.3 LogMAR ≤0.48) | 11 (19.3%) |
| Moderate/severe (>0.48 LogMAR) | 14 (24.6%) |
| *Vision impairment (better eye)* |  |
| None (≤0.3 LogMAR) | 39 (68.4%) |
| Mild (>0.3 LogMAR ≤0.48) | 8 (14.0%) |
| Moderate/severe (>0.48 LogMAR) | 8 (14.0%) |
| *Severity of DR (better eye)* |  |
| Mild non-proliferative DR | 18 (31.6%) |
| Moderate non-proliferative DR | 7 (12.3%) |
| Severe non-proliferative DR | 4 (7.0%) |
| Proliferative DR | 27 (47.4%) |
| *Severity of DME (better eye)* |  |
| None | 31 (54.4%) |
| Mild DME | 7 (12.3%) |
| Moderate DME | 3 (5.3%) |
| Clinically significant macular oedema | 14 (24.6%) |
|  | **Mean, median (range)** |
| *Age (years)* | 58.68, 58.41 (27.00-83.42) |
| *Duration of diabetes (years)* | 18.78, 16.94 (1.17-53.00) |

* Percentages for some variables may not equal 100% due to missing data

DME=Diabetic macular oedema; DR=Diabetic retinopathy

**Title**: Evaluation of item candidates for a diabetic retinopathy quality of life item bank.

**Journal name:** Quality of Life Research

**Authors**: Eva K Fenwick; Konrad Pesudovs; Jyoti Khadka; Gwyn Rees; Tien Y Wong; Ecosse L Lamoureux.

**Affiliation and email address of Corresponding Author:**

Centre for Eye Research, Department of Ophthalmology, University of Melbourne, Royal Victorian Eye and Ear Hospital, Melbourne, Victoria, Australia.

[ecosse@unimelb.edu.au](mailto:ecosse@unimelb.edu.au)
