# Supplementary material for: Evaluation of item candidates for a diabetic retinopathy quality of life item bank
Source: Springer Nature journal article supplement (doi:10.1007/s11136-012-0307-3), 2012-11-07
Supplement: MOESM4 [file 278170]

**Supplemental Table S3 – Item stems and response options for the nine quality of life domains**

| **Quality of life domain** | **Item stem** | **Response options** |
| --- | --- | --- |
|  | ***Because of your diabetic retinopathy…*** |  |
| Visual symptoms & Ocular surface symptoms | How often do you experience…? | *Never* to *Very often* |
|  | How severe is/are the…? | *Not at all* to *Severe* |
|  | How much of a problem is/are the…? | *None* to *A lot* |
| Activity limitation & Mobility | How much difficulty do you have… | *None* to *Unable to do because of my vision* |
| Emotional | How often do you… | *None of the time* to *All of the time* |
| Health Concerns | How concerned are you about… | *Not at all* to *Extremely* |
| Social | How much of a problem do you have with… | *None* to *Unable to do because of my vision* |
| Convenience | How much trouble is… | *None* to *Extreme* |
| Economic | How concerned are you about… | *Not at all* to *Extremely* |

**Title**: Evaluation of item candidates for a diabetic retinopathy quality of life item bank.

**Journal name:** Quality of Life Research

**Authors**: Eva K Fenwick; Konrad Pesudovs; Jyoti Khadka; Gwyn Rees; Tien Y Wong; Ecosse L Lamoureux.

**Affiliation and email address of Corresponding Author:**

Centre for Eye Research, Department of Ophthalmology, University of Melbourne, Royal Victorian Eye and Ear Hospital, Melbourne, Victoria, Australia.

[ecosse@unimelb.edu.au](mailto:ecosse@unimelb.edu.au)
